# Supplementary material
Source: Royal Society of Chemistry journal article supplement (doi:10.1039/d5tb02063h)
Supplement: d5tb02063h1.pdf [file d5tb02063h1.pdf]

## Supporting Information

### Freezing-Induced Ice–Polymer Structuring Enables Tough, Additive-Free Hydrogels Under Extreme Cold Conditions

Jialun Wei<sup>1</sup>, Dong Zhang<sup>2</sup>, Yung Chang<sup>3</sup>, Athena B Santi<sup>1</sup>, Amanda Gomez<sup>1</sup>,  
Lijin Wang<sup>1</sup>, Gabriela Romero Uribe<sup>1</sup>, Jie Zheng<sup>1\*</sup>

<sup>1</sup>Department of Biomedical Engineering and Chemical Engineering, The University of Texas at San Antonio, Texas 78249, USA

<sup>2</sup>The Wallace H. Coulter Department of Biomedical Engineering, Georgia Institute of Technology, Georgia 30332, USA

<sup>3</sup>R&D Center for Membrane Technology and Department of Chemical Engineering, Chung Yuan Christian University, Chung-Li 32023, Taiwan

\* E-mail: [jie.zheng@utsa.edu](mailto:jie.zheng@utsa.edu)

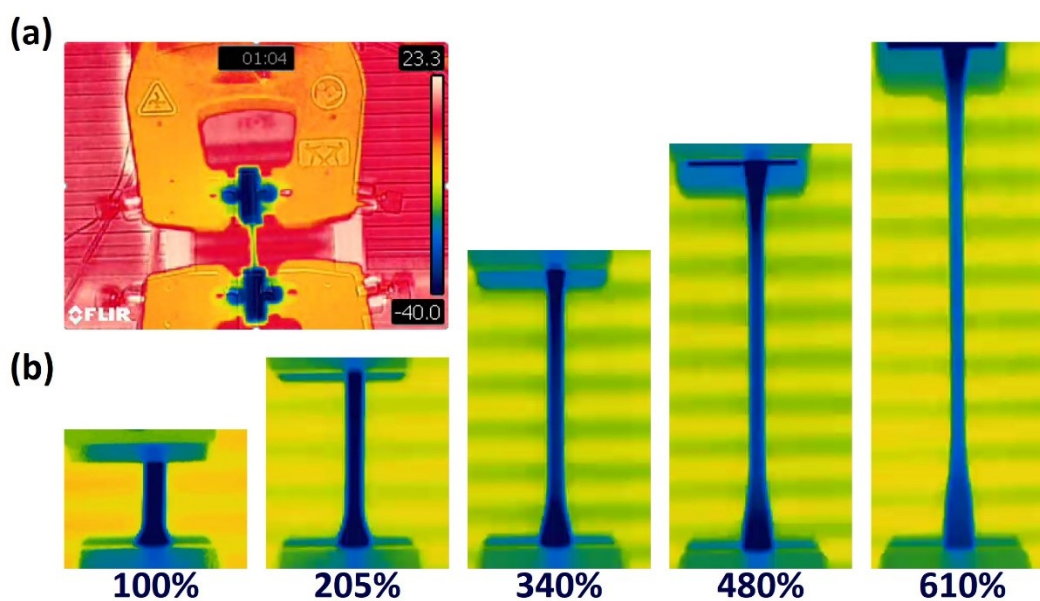

**Fig. S1. Infrared thermal imaging of frozen gelatin/pNAGA hydrogels during tensile testing at room temperature. (a)** Thermal image showing the setup immediately after mounting the frozen sample ( $t=0$  s). Pre-cooled grips ( $-40$  °C) were used to maintain the specimen temperature. **(b)** Temperature evolution during tensile testing up to 610% strain (total test duration  $t \approx 60$ s). The gauge region remains within the dark blue range ( $-40$  to  $-5$  °C), demonstrating that the hydrogel remained fully frozen throughout the deformation and failure process.

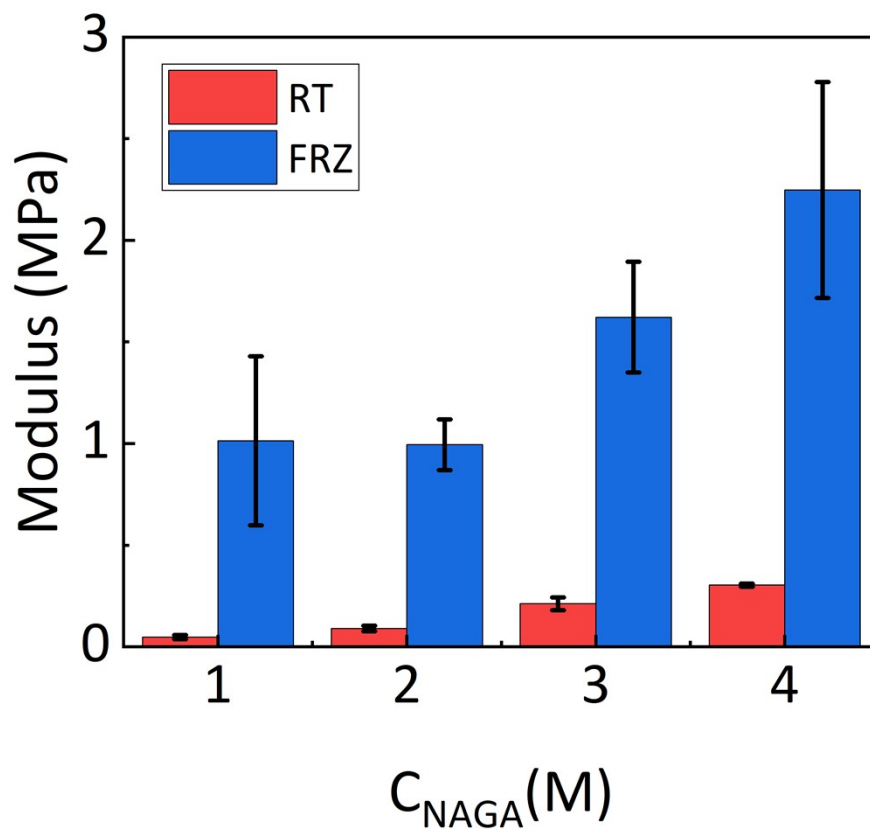

**Fig. S2.** Young's modulus of as-prepared and frozen DN hydrogels prepared with different concentration of NAGA ( $C_{NAGA}$ ) and a fixed concentration of gelatin ( $C_{gelatin}=80$  mg/mL). Error bars represent the standard deviation ( $n=3$ ).

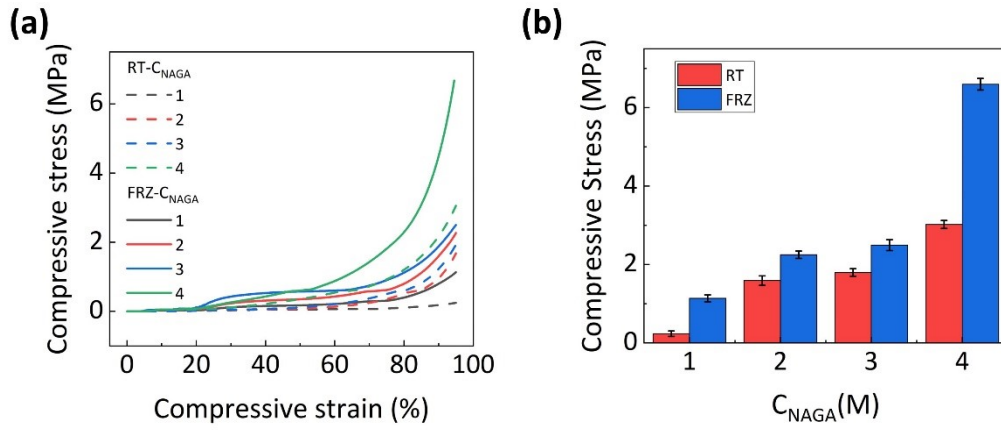

**Fig. S3. (a)** Compression strain-stress of as-prepared DN hydrogels and frozen hydrogels prepared with different  $C_{NAGA}$  and a fixed  $C_{gelatin}=80$  mg/mL. **(b)** Corresponding maximum stress at 95% compression. Error bars represent the standard deviation (n=3).

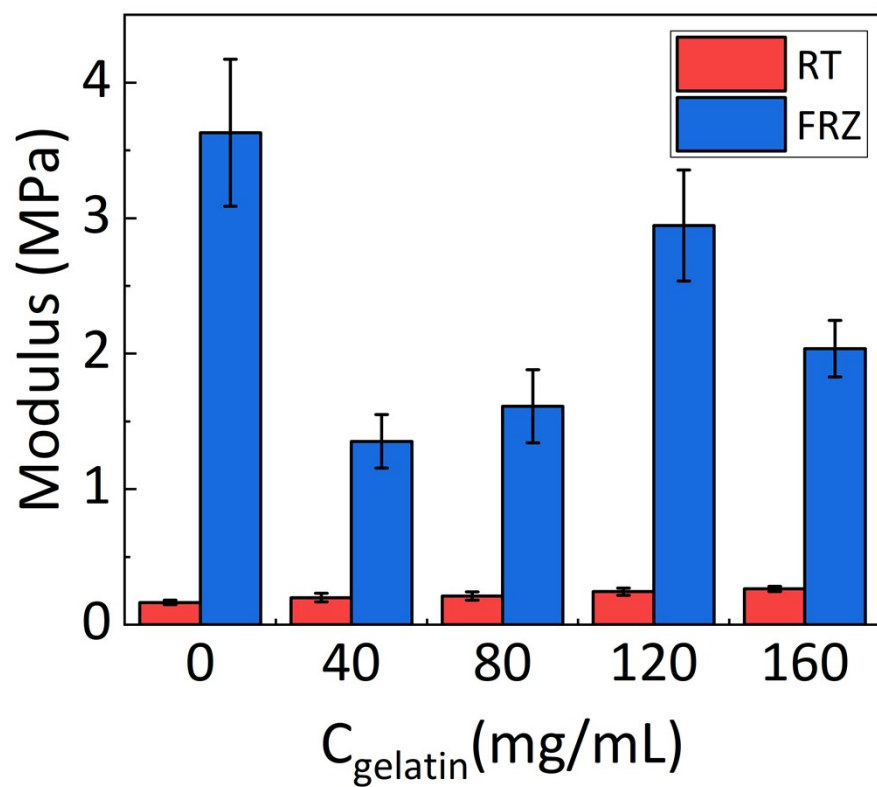

**Fig. S4.** Young's modulus of as-prepared and frozen DN hydrogels prepared with different concentration of gelatin ( $C_{\text{gelatin}}$ ) and a fixed concentration of NAGA ( $C_{\text{NAGA}}=3$  M). Error bars represent the standard deviation ( $n=3$ ).

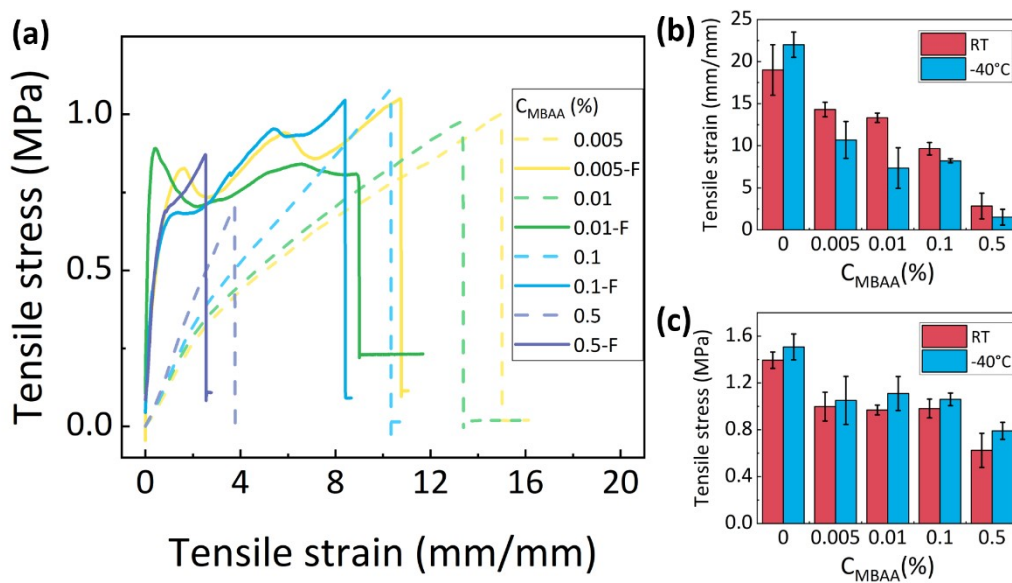

**Fig. S5: Effect of chemical crosslinker concentration (CMBA) on tensile performance at room temperature (RT) and  $-40^\circ\text{C}$ .** (a) Representative tensile stress–strain curves of hydrogels with varying CMBA (0–0.5%). Dashed lines denote RT, and solid lines denote  $-40^\circ\text{C}$ . (b) Corresponding maximum tensile strain and (c) tensile stress as a function of CMBA under RT and  $-40^\circ\text{C}$ .

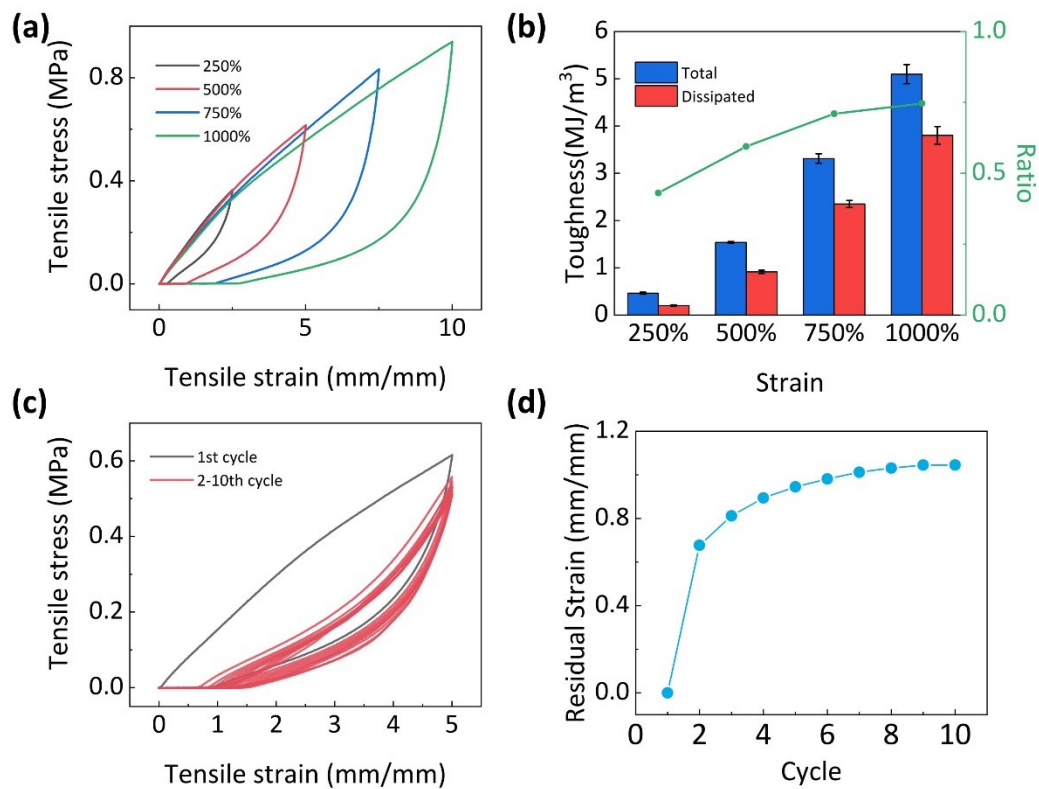

**Fig. S6.** Room temperature **(a)** Loading-unloading curves at different strain and **(b)** corresponding dissipated energy of DN hydrogels prepared at fixed composition of  $C_{\text{NAGA}}=3$  M and  $C_{\text{gelatin}}=80$  mg/mL. **(c)** Successive loading-unloading curves at 500% strain and **(d)** corresponding residual strain.

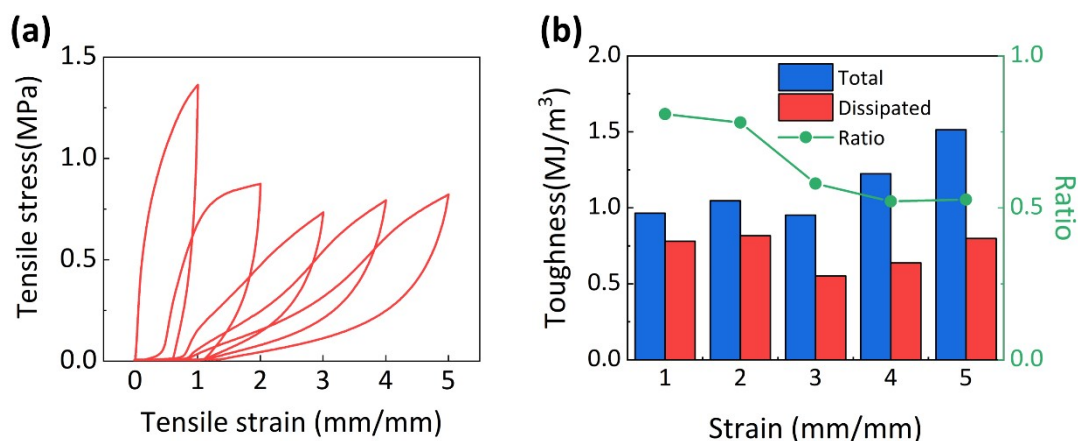

**Fig. S7. Successive loading–unloading cycles of frozen gelatin/pNAGA DN hydrogels prepared at  $-40^{\circ}\text{C}$  with composition of  $C_{\text{NAGA}}=3\text{ M}$  and  $C_{\text{gelatin}}=80\text{ mg/mL}$  under increasing strain. (a) Successive loading–unloading curves with maximum strain increasing from 1 to 5 mm/mm. (b) Corresponding total toughness (blue bar) and dissipated energy (red bar) as a function of strain. The green dots and right axis show the dissipation ratio. The results show a high dissipation ratio ( $\sim 80\%$ ) at low strains (1–2 mm/mm) due to the fracture of the rigid ice crystals, which decreases and stabilizes ( $\sim 50\%$ – $58\%$ ) at higher strains as the elasticity of the polymer network becomes dominant.**

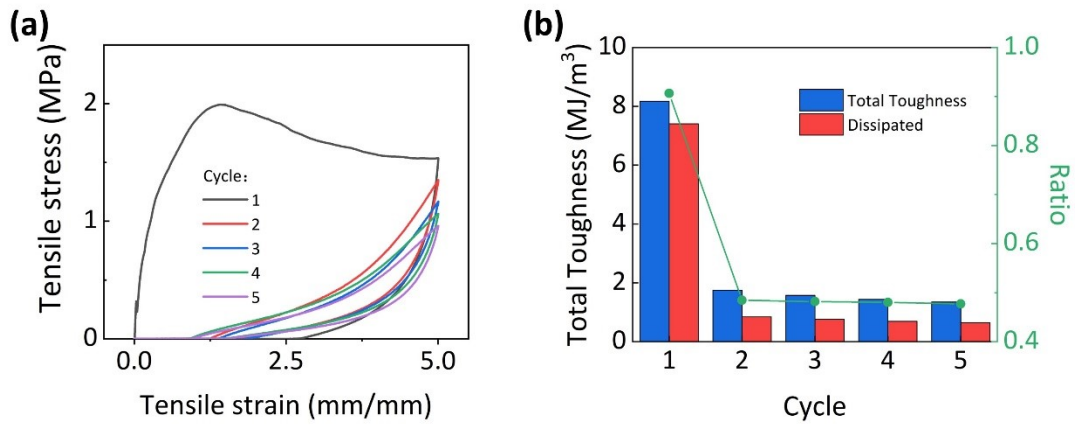

**Fig. S8. Consecutive loading–unloading cycles of frozen gelatin/pNAGA DN hydrogels prepared at  $-40^{\circ}\text{C}$  with composition of  $C_{\text{NAGA}}=3\text{ M}$  and  $C_{\text{gelatin}}=80\text{ mg/mL}$  at a fixed strain of  $5\text{ mm/mm}$ . (a) Consecutive loading–unloading curves (cycles 1–5). (b) Evolution of total toughness (area under loading curve, blue bar) and dissipated toughness (hysteresis area, red bar) with cycle number. The green dot and right axis show the dissipation ratio of dissipated energy/total input energy. The data reveal pronounced Mullins-like softening: the first cycle exhibits markedly higher stiffness and a very large hysteresis loop due to sacrificial ice-crystal fracture, while subsequent cycles almost perfectly overlap with greatly reduced and stable toughness and dissipation.**

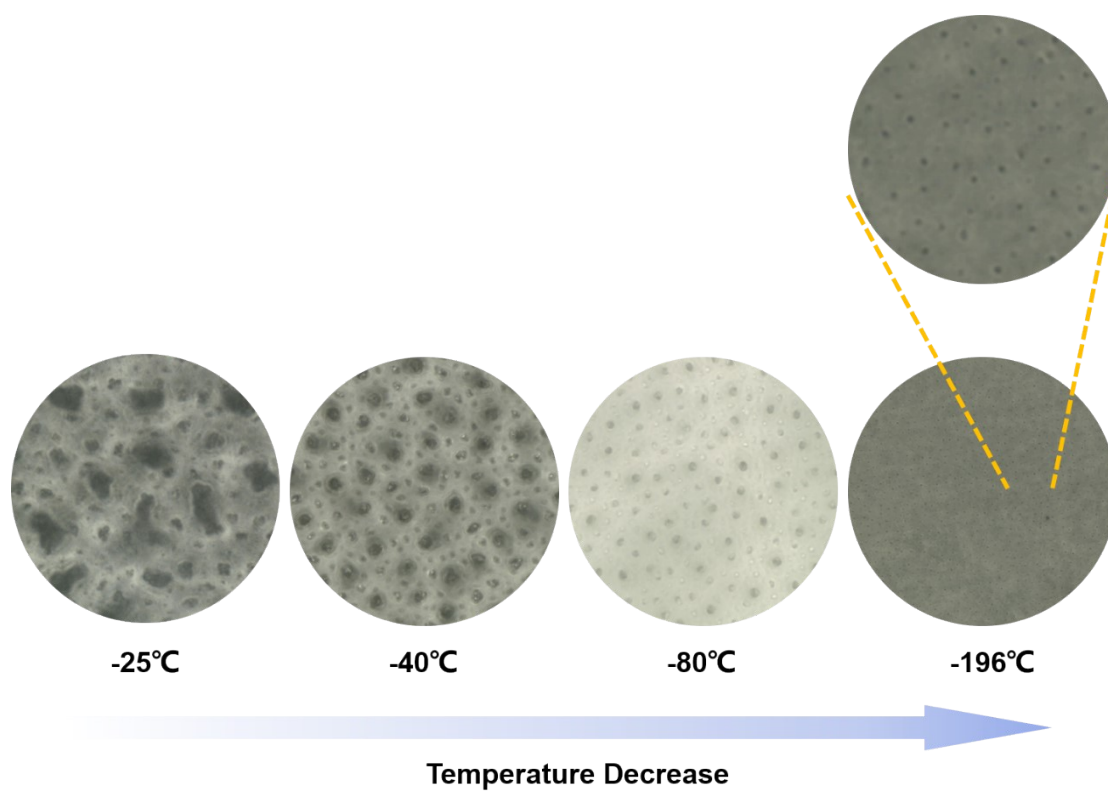

**Fig. S9.** Microscopic morphology of hydrogels frozen at different temperatures and observed after thawing, showing pore structures previously occupied by ice crystals.

**Table S1:** Summary of representative antifreezing hydrogel systems reported in the literature, including hydrogel composition, category (additive-free, organogel, protein-assisted, ionic, or nanocomposite), operating temperature, and tensile mechanical properties (strain and stress). Data correspond to the entries plotted in **Fig. 9**.

| Gel Type                    | Polymer Network                | Additives                      | T (°C)  | Stress (MPa) | Strain (%)  | Ref.      |
|-----------------------------|--------------------------------|--------------------------------|---------|--------------|-------------|-----------|
| Intrinsic Polymer Hydrogels | Gelatin/pNAGA                  | –                              | -40     | 1.5~2.3      | 1000~2200   | This Work |
|                             | EGINA-Crosslinked DN Hydrogels | –                              | -20     | 0.1~0.65     | 200~3000    | 48        |
|                             | PDMAAPS                        | –                              | -20     | 0.1          | 2000        | 62        |
|                             | P(MMA-co-HEA)                  | –                              | -45~-20 | 2.2~25.3     | 69~850      | 63        |
|                             | PSBMA                          | –                              | -20     | 0.19         | 1167        | 64        |
|                             | P(AAm-co-MAAc)                 | –                              | -45     | 30           | 35          | 65        |
|                             | poly(AM-co-SBMA)/PDADMA C      | –                              | -10     | 0.2          | 800         | 66        |
| Organogels                  | PVA/PAAc                       | Glycerol                       | -40     | 50           | 200         | 68        |
|                             | PVA                            | DMSO                           | -30     | 20~30        | 40~400      | 69        |
|                             | Gelatin/PMAA                   | Glycerol                       | -23     | 0.4          | 300         | 70        |
|                             | Gelatin/PU nanomesh            | Glycerol                       | -80     | 1            | 250         | 71        |
|                             | PAMPS/PAAm                     | Glycerol, Choline chloride     | -20     | 0.41         | 335         | 72        |
|                             | PAAm                           | Glycerol, betaine              | -20     | 0.18         | 1934        | 73        |
|                             | PVDF/P(AAm-co-AN-NaSS)         | Glycerol                       | -20     | 2            | 700         | 74        |
|                             | Cellulose                      | Glycerol                       | -40     | 2.11         | 846         | 75        |
| Protein-assisted Hydrogels  | P(AAm-co-AAc)                  | IBP, INP                       | -30~0   | 5.2~21.7     | 137.5~254.9 | 76        |
|                             | P(AAm-co-AMPS)                 | AFPs                           | -10     | 0.05         | 1400        | 77        |
|                             | P(AAm-co-MAANa)/PVA            | AFPs                           | -15     | 0.06         | 1000        | 78        |
| Ionic Hydrogels             | PVA                            | Sodium lignosulfonate          | -60     | 10           | 375         | 79        |
|                             | Alg/PAAm                       | H <sub>2</sub> SO <sub>4</sub> | -100    | 0.65         | 300         | 80        |
|                             | CMCS/PAAM                      | ZnClO <sub>4</sub>             | -30     | 0.15         | 320         | 81        |
|                             | PHEA                           | KAc                            | -60~0   | 0.2~0.3      | 400~600     | 82        |
|                             | PVA/PEI                        | LiCl                           | -80     | 0.01~0.02    | 7000~8000   | 83        |

|                             |                    |                                                                          |         |           |         |    |
|-----------------------------|--------------------|--------------------------------------------------------------------------|---------|-----------|---------|----|
|                             | PAAc               | Betaine,<br>AlCl <sub>3</sub>                                            | -50     | 1.088     | 2026    | 84 |
|                             | PVA                | KCl                                                                      | -10     | 1.36      | 172     | 85 |
|                             | Silk fibroin       | EMImAc                                                                   | -50~-10 | 0.58~0.84 | 80~95   | 85 |
|                             | Gelatin            | Ca(NO) <sub>2</sub> ,<br>(NH <sub>4</sub> ) <sub>2</sub> SO <sub>4</sub> | -80     | 2.17      | 297     | 86 |
|                             | P(SBMA-co-HEA)     | LiCl                                                                     | -40     | 0.005     | 325     | 87 |
|                             | P(HEA-co-AA)       | LiCl,<br>Sodium<br>lignosulfo<br>nate                                    | -18     | 0.685     | 2403    | 88 |
|                             | P(SBMA-co-AA)      | ZnCl <sub>2</sub>                                                        | -60~-20 | 0.38~0.42 | 420~450 | 89 |
|                             | P(AAm-co-SV)       | SG,GA,S<br>S                                                             | -35     | 0.055     | 1041    | 90 |
| Nanocomposi<br>te Hydrogels | PAAc               | CNC@H<br>A, Proline                                                      | -30     | 1         | 750     | 91 |
|                             | PVA/P(AAm-co-AMPS) | CNFs                                                                     | -10     | 0.09      | 470     | 92 |
|                             | PAAm               | Nanocell<br>ulose                                                        | -40~-20 | 0.12      | 800     | 93 |
|                             | PAAm               | cellulose<br>nanofibril                                                  | -50~-15 | 0.3~0.4   | 450~500 | 94 |
|                             | P(AAm-co-AAc)      | PDA-<br>decorated<br>carbon<br>nanotubes                                 | -20     | 0.055     | 520     | 95 |
